# Supplementary material for: A compendium of DIS3 mutations and associated transcriptional signatures in plasma cell dyscrasias
Source: PubMed Central journal article supplement (PMC4694891; doi:10.18632/oncotarget.4674), 2015-07-20
Supplement: oncotarget-06-26129-s001.pdf [file oncotarget-06-26129-s001.pdf]

## SUPPLEMENTARY MATERIAL

### **A compendium of *DIS3* mutations and associated transcriptional signatures in plasma cell dyscrasias**

|                                           |   |
|-------------------------------------------|---|
| Supplementary Materials and Methods ..... | 2 |
| Supplementary Figures .....               | 3 |
| Supplementary Tables .....                | 5 |

## SUPPLEMENTARY MATERIALS AND METHODS

### Mutation analyses

Genomic DNA was extracted using Wizard genomic purification DNA kit (Promega Corporation, Madison, WI, USA) according to manufacturer's instructions, spectrophotometrically quantified and amplified using FastStart High Fidelity Polymerase (Roche) and fusion primers (Roche) containing M13 adapter sequences and the sequence-specific primers (Supplementary Table S6) spanning *DIS3* exons 1–4 for the PIN domain and exons 10–18 for the RNB domain (RefSeq NM\_014953.4, representing the longer transcript encoding the longest protein isoform).

Amplicon library A and B sequencing adapters and multiplex identifier (MID) tags were then added to both tails of amplicons by a second amplification step. PCR conditions were as follows: in the first amplification step, denaturation step at 94°C for 5 min. followed by 25 cycles at 94°C (30 sec. per cycle), annealing step at 53°C (for exon 1), 57°C (for exons 10, 11 and 17), or 58°C (for the remaining exons) (30 sec. per cycle), and extension at 72°C (45 sec. per cycle), followed by a final extension at 72°C for 7 min.; in the second amplification step, denaturation step at 94°C for 5 min. followed by 25 cycles at 94°C (20 sec. per cycle), annealing step at 55°C (20 sec. per cycle), and extension at 72°C (45 sec. per cycle), followed by a final extension at 72°C for 10 min.. PCR products were visualized on agarose gel, purified using AMPure XP DNA-binding paramagnetic beads (Agencourt Bioscience Corp., Beckman Coulter S.p.A, Milan, Italy), and quantified using picogreen dye (Life Technologies, Carlsbad, California) and the Victor X2 (Perkin Elmer, Waltham, Massachusetts) fluorometer. Samples were then pooled together at equimolar ratios to prepare for Roche/454 pyrosequencing. The obtained amplicon library was added to the emulsion PCR at a ratio of 0.8 molecules per bead and subjected to deep sequencing on the Genome Sequencer Junior instrument (Roche-454 Life Sciences). The obtained sequencing reads were mapped to the *DIS3* human reference sequence (RefSeq NC\_000013.10) and analyzed by the Amplicon Variant Analyzer (AVA) software version 3.0 (Roche-454 Life Sciences) to establish the mutant allele frequency.

To verify the occurrence of *DIS3* variants at transcriptional level, total RNA of mutated samples was converted to cDNA using M-MLV reverse transcriptase (Invitrogen Life Technologies, Carlsbad, California) and random hexamers, and subjected to deep sequencing of the exon harboring the variant/s detected on genomic DNA. Sequence-specific exonic PCR primers were designed in the Primer 3 program (<http://frodo.wi.mit.edu/primer3/>) and are reported in Supplementary Table S7.

### Gene expression profiling and data analysis

For gene expression profiling (GEP), samples were profiled on the GeneChip Human Gene 1.0 ST array (Affymetrix, Santa Clara, CA, USA), as previously described [1]. Briefly, the raw intensity expression values were processed by Robust Multi-array Average procedure (RMA) [2], with the re-annotated Chip Definition Files from BrainArray libraries version 18.0.0 [3], available at <http://brainarray.mbni.med.umich.edu>. Supervised analyses were performed using Significant Analysis of Microarrays software (SAM version 4.00; Excel front-end publicly available at <http://www-stat.stanford.edu/tibs/SAM/index.html>) [4] as previously described [5]. The cutoff point for statistical significance ( $q$ -value < 10%) was determined by tuning the  $\Delta$  parameter on the false discovery rate (FDR) and controlling the  $q$ -value of the selected probes. Differentially expressed genes were also evaluated at higher stringency level (median FDR 0%). The functional annotation analysis on the selected lists was performed by means of DAVID 6.7 tool (<http://david.abcc.ncifcrf.gov/>) and the ToppFun option of ToppGene Suite (<https://toppgene.cchmc.org/>), using the default parameters.

### REFERENCES

1. Todoerti K, Agnelli L, Fabris S, Lionetti M, Tuana G, Mosca L, Lombardi L, Grieco V, Bianchino G, D'Auria F, Statuto T, Mazzoccoli C, De Luca L, et al. Transcriptional characterization of a prospective series of primary plasma cell leukemia revealed signatures associated with tumor progression and poorer outcome. *Clin Cancer Res.* 2013; 19:3247–3258.
2. Irizarry RA, Hobbs B, Collin F, Beazer-Barclay YD, Antonellis KJ, Scherf U, Speed TP. Exploration, normalization, and summaries of high density oligonucleotide array probe level data. *Biostatistics.* 2003; 4:249–264.
3. Dai MH, Wang PL, Boyd AD, Kostov G, Athey B, Jones EG, Bunney WE, Myers RM, Speed TP, Akil H, Watson SJ, Meng F. Evolving gene/transcript definitions significantly alter the interpretation of GeneChip data. *Nucleic Acids Res.* 2005; 33:e175.
4. Tusher VG, Tibshirani R, Chu G. Significance analysis of microarrays applied to the ionizing radiation response. *Proc Natl Acad Sci U S A.* 2001; 98:5116–5121.
5. Agnelli L, Fabris S, Biciato S, Basso D, Baldini L, Morabito F, Verdelli D, Todoerti K, Lambertenghi-Deliliers G, Lombardi L, Neri A. Upregulation of translational machinery and distinct genetic subgroups characterise hyperdiploidy in multiple myeloma. *Br J Haematol.* 2007; 136:565–573.

## SUPPLEMENTARY FIGURES AND TABLES

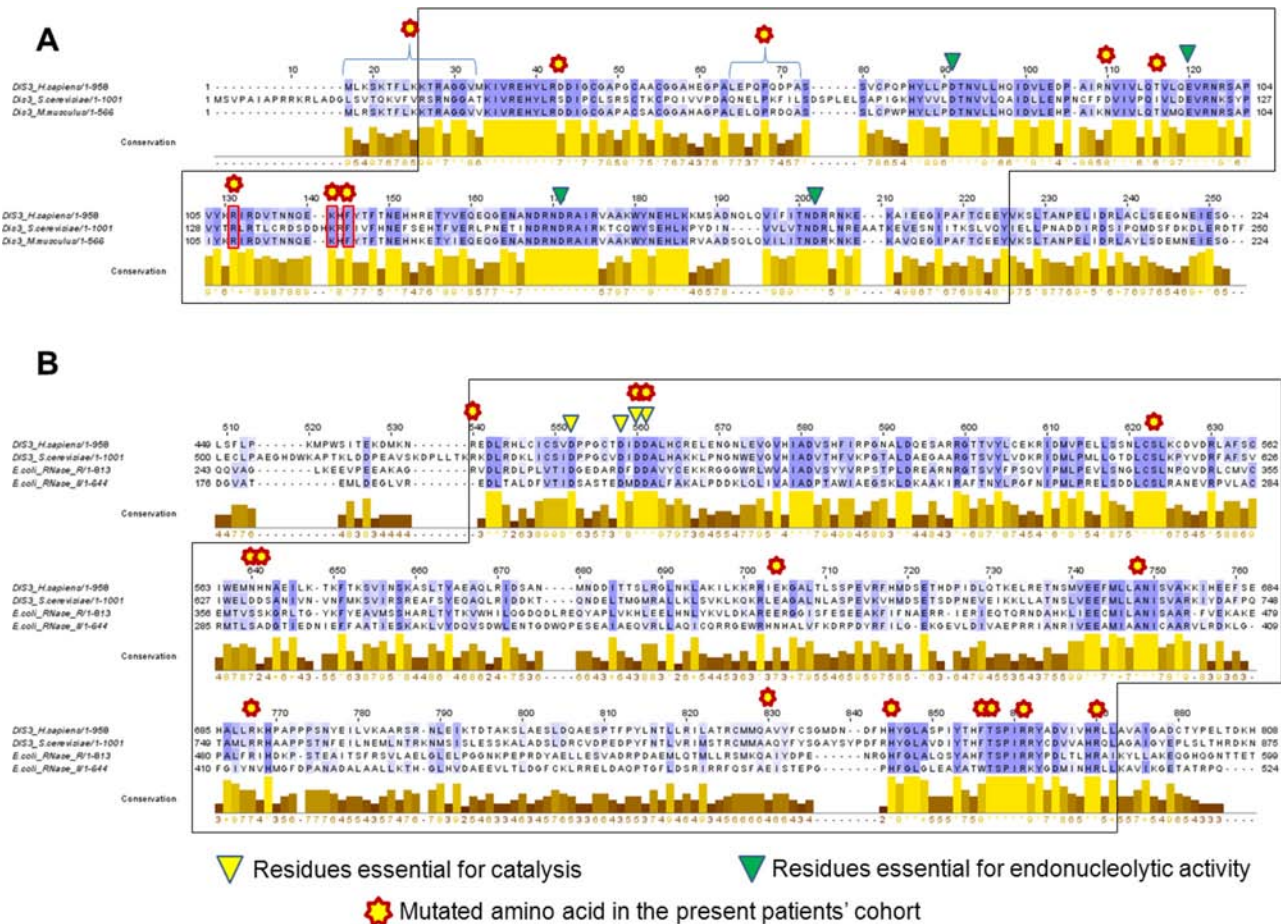

**Supplementary Figure S1: Detailed amino acid sequence alignment of DIS3 proteins of various species.** In particular, human, yeast and murine DIS3 PIN domains were compared (A), and human and yeast RNB domains were aligned with *E.coli* RNases II and R (B). Each domain is bordered by a black frame. Stars indicate genic positions targeted by missense mutations or in-frame deletions in the present primary patients' series. Green triangles indicate acidic residues predicted to coordinate a divalent cation and essential for endonucleolytic activity. Yellow triangles indicate residues involved in binding the magnesium ion at the active site. Sequence alignment was performed by Jalview software v2.7.

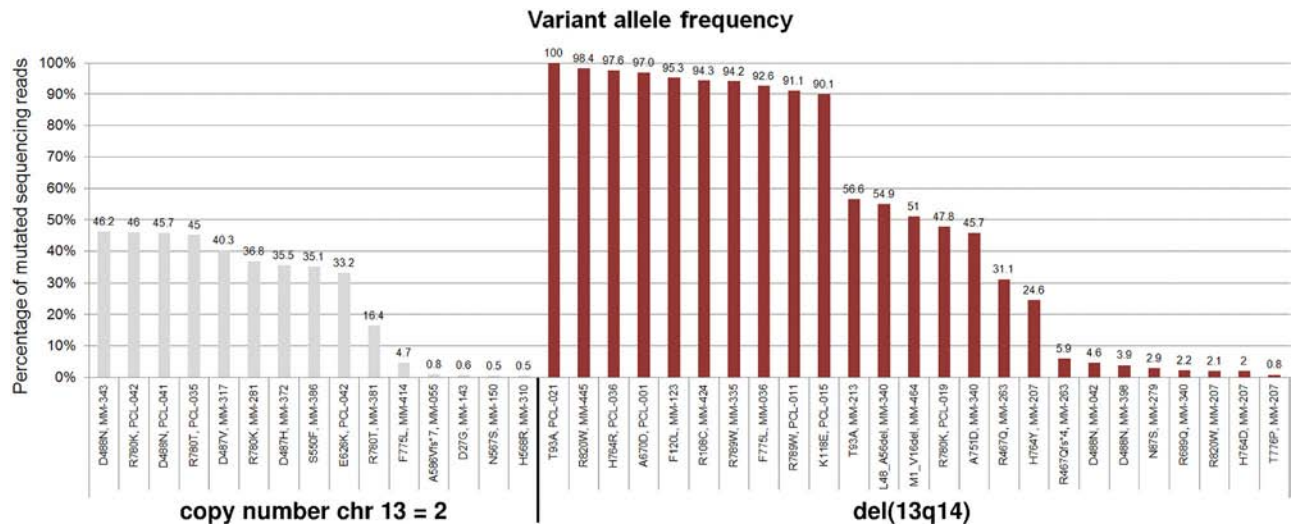

**Supplementary Figure S2: Percentage of variant *DIS3* sequencing reads on total sequencing reads for the non-synonymous somatic mutations identified by NGS analysis in primary patients.** Horizontal axis: sample id and carried amino acid variant are reported; patients are ordered according to copy number of chromosome 13 and decreasing mutation load.

**Supplementary Table S1. Prediction of the functional relevance of the 26 missense *DIS3* mutations found in the present primary patients' cohort**

| AA change    | Polyphen2         | Mutation Taster | Mutation Assessor [FI score]          | SIFT PREDICTION (SIFT score) | LRT (Likelihood Ratio test) |
|--------------|-------------------|-----------------|---------------------------------------|------------------------------|-----------------------------|
| <b>D27G</b>  | PROBABLY DAMAGING | DISEASE CAUSING | PREDICTED FUNCTIONAL (MEDIUM) [3.165] | DAMAGING (0.01)              | DELETERIOUS                 |
| <b>N87S</b>  | PROBABLY DAMAGING | DISEASE CAUSING | PREDICTED FUNCTIONAL (MEDIUM) [2.98]  | DAMAGING (0.03)              | DELETERIOUS                 |
| <b>T93A</b>  | POSSIBLY DAMAGING | DISEASE CAUSING | PREDICTED FUNCTIONAL (MEDIUM) [3.34]  | DAMAGING (0)                 | DELETERIOUS                 |
| <b>R108C</b> | PROBABLY DAMAGING | DISEASE CAUSING | PREDICTED FUNCTIONAL (MEDIUM) [3.45]  | DAMAGING (0)                 | NEUTRAL                     |
| <b>K118E</b> | POSSIBLY DAMAGING | DISEASE CAUSING | PREDICTED FUNCTIONAL (MEDIUM) [3.24]  | DAMAGING (0.01)              | NEUTRAL                     |
| <b>F120L</b> | PROBABLY DAMAGING | DISEASE CAUSING | PREDICTED FUNCTIONAL (MEDIUM) [3.065] | DAMAGING (0.05)              | DELETERIOUS                 |
| <b>R467Q</b> | PROBABLY DAMAGING | DISEASE CAUSING | PREDICTED FUNCTIONAL (HIGH) [4.675]   | DAMAGING (0)                 | DELETERIOUS                 |
| <b>D487H</b> | PROBABLY DAMAGING | DISEASE CAUSING | PREDICTED FUNCTIONAL (HIGH) [4.74]    | DAMAGING (0)                 | DELETERIOUS                 |
| <b>D487V</b> | PROBABLY DAMAGING | DISEASE CAUSING | PREDICTED FUNCTIONAL (HIGH) [4.74]    | DAMAGING (0)                 | DELETERIOUS                 |

(Continued)

| AA change    | Polyphen2         | Mutation Taster | Mutation Assessor [FI score]                | SIFT PREDICTION (SIFT score) | LRT (Likelihood Ratio test) |
|--------------|-------------------|-----------------|---------------------------------------------|------------------------------|-----------------------------|
| <b>D488N</b> | PROBABLY DAMAGING | DISEASE CAUSING | PREDICTED FUNCTIONAL (HIGH) [4.74]          | DAMAGING (0)                 | DELETERIOUS                 |
| <b>S550F</b> | PROBABLY DAMAGING | DISEASE CAUSING | PREDICTED FUNCTIONAL (HIGH) [4.775]         | DAMAGING (0)                 | DELETERIOUS                 |
| <b>N567S</b> | BENIGN            | DISEASE CAUSING | PREDICTED NON-FUNCTIONAL (NEUTRAL) [-0.345] | TOLERATED (0.19)             | DELETERIOUS                 |
| <b>H568R</b> | BENIGN            | DISEASE CAUSING | PREDICTED NON-FUNCTIONAL (NEUTRAL) [-0.455] | TOLERATED (0.26)             | NEUTRAL                     |
| <b>E626K</b> | BENIGN            | DISEASE CAUSING | PREDICTED NON-FUNCTIONAL (LOW) [0.835]      | TOLERATED (0.63)             | DELETERIOUS                 |
| <b>A670D</b> | PROBABLY DAMAGING | DISEASE CAUSING | PREDICTED FUNCTIONAL (HIGH) [4.74]          | DAMAGING (0)                 | DELETERIOUS                 |
| <b>R689Q</b> | PROBABLY DAMAGING | DISEASE CAUSING | PREDICTED FUNCTIONAL (HIGH) [4.77]          | DAMAGING (0)                 | DELETERIOUS                 |
| <b>A751D</b> | PROBABLY DAMAGING | DISEASE CAUSING | PREDICTED FUNCTIONAL (HIGH) [4.77]          | DAMAGING (0)                 | DELETERIOUS                 |
| <b>H764D</b> | PROBABLY DAMAGING | DISEASE CAUSING | PREDICTED FUNCTIONAL (HIGH) [4.77]          | DAMAGING (0)                 | DELETERIOUS                 |

(Continued)

| AA change    | Polyphen2         | Mutation Taster | Mutation Assessor [FI score]          | SIFT PREDICTION (SIFT score) | LRT (Likelihood Ratio test) |
|--------------|-------------------|-----------------|---------------------------------------|------------------------------|-----------------------------|
| <b>H764R</b> | PROBABLY DAMAGING | DISEASE CAUSING | PREDICTED FUNCTIONAL (HIGH) [4.77]    | DAMAGING (0)                 | DELETERIOUS                 |
| <b>H764Y</b> | PROBABLY DAMAGING | DISEASE CAUSING | PREDICTED FUNCTIONAL (HIGH) [4.77]    | DAMAGING (0)                 | DELETERIOUS                 |
| <b>F775L</b> | PROBABLY DAMAGING | DISEASE CAUSING | PREDICTED FUNCTIONAL (HIGH) [4.77]    | DAMAGING (0)                 | DELETERIOUS                 |
| <b>T776P</b> | PROBABLY DAMAGING | DISEASE CAUSING | PREDICTED FUNCTIONAL (HIGH) [4.77]    | DAMAGING (0)                 | DELETERIOUS                 |
| <b>R780K</b> | PROBABLY DAMAGING | DISEASE CAUSING | PREDICTED FUNCTIONAL (HIGH) [4.77]    | DAMAGING (0)                 | DELETERIOUS                 |
| <b>R780T</b> | PROBABLY DAMAGING | DISEASE CAUSING | PREDICTED FUNCTIONAL (HIGH) [4.77]    | DAMAGING (0)                 | DELETERIOUS                 |
| <b>R789W</b> | POSSIBLY DAMAGING | DISEASE CAUSING | PREDICTED FUNCTIONAL (HIGH) [4.77]    | DAMAGING (0)                 | DELETERIOUS                 |
| <b>R820W</b> | PROBABLY DAMAGING | DISEASE CAUSING | PREDICTED FUNCTIONAL (MEDIUM) [3.275] | DAMAGING (0)                 | DELETERIOUS                 |



Supplementary Table S2. Clinical and molecular characteristics of the 33 MM/PCL patients carrying *DIS3* non-synonymous mutations or indels

| Sample name | Disease stage <sup>†</sup> | Variant*              | Mutated reads (%) |          |           |         |         |         |          |          |          |         | HD* |    |    |  |
|-------------|----------------------------|-----------------------|-------------------|----------|-----------|---------|---------|---------|----------|----------|----------|---------|-----|----|----|--|
|             |                            |                       | AA change         | del (13) | del (17p) | 1q gain | 1p loss | t(4;14) | t(11;14) | t(14;16) | t(14;20) | t(6;14) |     |    |    |  |
| MM-036      | MM                         | 73336078A>C           | F775L             | +        | -         | +       | nd      | -       | -        | -        | -        | -       | -   | -  | -  |  |
| MM-042      | MM                         | 73346338C>T           | D488N             | +        | -         | +       | -       | +       | -        | -        | -        | -       | -   | -  | +  |  |
| MM-055      | MM                         | 73343049_73343050insA | A586Vfs*7         | -        | -         | -       | nd      | -       | +        | -        | -        | -       | -   | -  | -  |  |
| MM-123      | MM                         | 73355010G>C           | F120L             | +        | -         | +       | -       | +       | -        | -        | -        | -       | -   | -  | -  |  |
| MM-143      | MM                         | 73355891T>C           | D27G              | -        | -         | +       | -       | -       | -        | -        | -        | -       | -   | -  | +  |  |
| MM-150      | MM                         | 73345097T>C           | N567S             | -        | -         | +       | -       | -       | -        | -        | -        | -       | -   | -  | +  |  |
| MM-207      | MM                         | 73336113G>A           | H764Y             |          |           |         |         |         |          |          |          |         |     |    |    |  |
|             |                            | 73335837G>A           | R820W             | +        | -         |         |         |         |          |          |          |         |     |    |    |  |
|             |                            | 73336113G>C           | H764D             |          | -         |         |         |         |          |          |          |         |     |    |    |  |
|             |                            | 73336077T>G           | T776P             |          |           |         |         |         |          |          |          |         |     |    |    |  |
| MM-213      | MM                         | 73355093T>C           | T93A              | +        | -         | -       | -       | -       | +        | -        | -        | -       | -   | -  | -  |  |
| MM-263      | MM                         | 73346400C>T           | R467Q             | +        | -         | +       | -       | +       | -        | -        | -        | -       | -   | -  | -  |  |
|             |                            | 73346400del           | R467Qfs*4         |          |           |         |         |         |          |          |          |         |     |    |    |  |
| MM-279      | MM                         | 73355110T>C           | N87S              | +        | -         | +       | -       | -       | -        | -        | -        | -       | nd  | nd | nd |  |
| MM-281      | MM                         | 73336064C>T           | R780K             | -        | -         | -       | -       | -       | -        | -        | -        | -       | -   | -  | -  |  |
| MM-310      | MM                         | 73345094T>C           | H568R             | -        | -         | -       | -       | -       | +        | -        | -        | -       | -   | -  | -  |  |
| MM-335      | MM                         | 73335930G>A           | R789W             | +        | -         | -       | -       | -       | -        | -        | +        | -       | -   | -  | -  |  |

(Continued)



| Sample name | Disease stage <sup>†</sup> | Variant*                                           | Mutated reads (%) |        | AA change                    | del (13) | del (17p) | 1q gain | 1p loss | t(4;14) | t(11;14) | t(14;16) | t(14;20) | t(6;14) | HD* |
|-------------|----------------------------|----------------------------------------------------|-------------------|--------|------------------------------|----------|-----------|---------|---------|---------|----------|----------|----------|---------|-----|
|             |                            |                                                    | reads (%)         | (%)    |                              |          |           |         |         |         |          |          |          |         |     |
| MM-340      | MM                         | 73355804_73355830del<br>73336151G>T<br>73337650C>T | 54.86%            | 45.71% | L48_A56del<br>A751D<br>R689Q | +        | -         | -       | -       | -       | +        | -        | -        | -       | -   |
| MM-343      | MM                         | 73346338C>T                                        | 46.18%            |        | D488N                        | -        | -         | -       | -       | -       | +        | -        | -        | -       | -   |
| MM-372      | MM                         | 73346341C>G                                        | 35.48%            |        | D487H                        | -        | -         | +       | -       | -       | +        | -        | -        | -       | -   |
| MM-381      | MM                         | 73336064C>G                                        | 16.38%            |        | R780T                        | -        | -         | -       | -       | -       | -        | -        | nd       | nd      | nd  |
| MM-386      | MM                         | 73345240G>A                                        | 35.11%            |        | S550F                        | -        | -         | nd      | nd      | -       | nd       | nd       | nd       | nd      | nd  |
| MM-398      | MM                         | 73346338C>T                                        | 3.85%             |        | D488N                        | +        | -         | +       | -       | -       | +        | -        | -        | -       | -   |
| MM-414      | MM                         | 73336078A>C                                        | 4.71%             |        | F775L                        | -        | -         | -       | -       | -       | +        | -        | -        | -       | -   |
| MM-424      | MM                         | 73355048G>A                                        | 94.33%            |        | R108C                        | +        | -         | -       | +       | -       | -        | -        | -        | -       | +   |
| MM-445      | MM                         | 73335837G>A                                        | 98.36%            |        | R820W                        | +        | -         | +       | -       | -       | +        | -        | -        | nd      | -   |
| MM-464      | MM                         | 73355968C>T                                        | 50.99%            |        | M1_V16del                    | +        | -         | +       | -       | -       | -        | -        | -        | -       | -   |
| MM-317      | MM                         | 73346340T>A                                        | 40.3%             |        | D487V                        | -        | -         | +       | -       | -       | +        | -        | -        | -       | -   |
| PCL-001     | pPCL                       | 73337707G>T                                        | 97%               |        | A670D                        | +        | -         | nd      | nd      | -       | -        | -        | +        | -       | nd  |
| PCL-015     | pPCL                       | 73355018T>C                                        | 90.05%            |        | K118E                        | +        | -         | +       | -       | -       | -        | +        | -        | -       | -   |
| PCL-019     | pPCL                       | 73336064C>T                                        | 47.75%            |        | R780K                        | +        | +         | +       | +       | -       | -        | +        | -        | -       | -   |
| PCL-021     | pPCL                       | 73355093T>C                                        | 100%              |        | T93A                         | +        | -         | +       | -       | +       | -        | -        | -        | -       | -   |

(Continued)

| Sample name | Disease stage <sup>†</sup> | Variant*                   | Mutated reads (%) | AA change      | del (13) | del (17p) | 1q gain | 1p loss | t(4;14) | t(11;14) | t(14;16) | t(14;20) | t(6;14) | HD <sup>‡</sup> |
|-------------|----------------------------|----------------------------|-------------------|----------------|----------|-----------|---------|---------|---------|----------|----------|----------|---------|-----------------|
| PCL-035     | pPCL                       | 73336064C>G                | 45.04%            | R780T          | -        | -         | -       | -       | -       | +        | -        | -        | -       | -               |
| PCL-036     | pPCL                       | 73336112T>C                | 97.59%            | H764R          | +        | -         | -       | -       | -       | +        | -        | -        | -       | -               |
| PCL-011     | sPCL                       | 73335930G>A                | 91.1%             | R789W          | +        | +         | +       | -       | -       | -        | +        | -        | -       | -               |
| PCL-041     | sPCL                       | 73346338C>T                | 45.68%            | D488N          | -        | -         | nd      | nd      | -       | nd       | nd       | nd       | nd      | nd              |
| PCL-042     | sPCL                       | 73336064C>T<br>73342930C>T | 45.95%<br>33.15%  | R780K<br>E626K | -        | -         | -       | -       | -       | +        | -        | -        | -       | -               |

<sup>†</sup>MM: multiple myeloma; pPCL: primary plasma cell leukemia; sPCL: secondary plasma cell leukemia.

\* Genomic positions based on hg19. ‡HD: presence of the hyperdiploid status on the basis of FISH evaluation criteria

**Supplementary Table S3. Mutational status of *DIS3* gene in 19 longitudinally analyzed patients**

| Sample name | Disease stage              | <i>DIS3</i> status                           |
|-------------|----------------------------|----------------------------------------------|
| MM-004      | MM onset                   | wild type                                    |
|             | MM relapse                 | A827P, 97.1%                                 |
| MM-146      | MM onset                   | wild type                                    |
|             | MM relapse                 | wild type                                    |
| MM-151      | MM onset                   | wild type                                    |
|             | MM relapse                 | wild type                                    |
| MM-200      | MM onset                   | wild type                                    |
|             | MM relapse                 | wild type                                    |
| MM-239      | MM onset                   | wild type                                    |
|             | MM relapse                 | wild type                                    |
| MM-263      | MM onset                   | R467Q, 31.1%; R467Qfs*4, 5.9%                |
|             | MM relapse                 | R467Q, 81.9%                                 |
| MM-271      | MM onset                   | wild type                                    |
|             | MM relapse                 | wild type                                    |
| MM-280      | MM onset                   | wild type                                    |
|             | MM relapse                 | wild type                                    |
| MM-282      | MM onset                   | wild type                                    |
|             | MM relapse                 | wild type                                    |
| MM-286      | MM onset                   | wild type                                    |
|             | MM relapse                 | wild type                                    |
| MM-327      | MM onset                   | wild type                                    |
|             | MM relapse                 | wild type                                    |
| MM-334      | MM onset                   | wild type                                    |
|             | MM relapse                 | wild type                                    |
| MM-340      | MM onset                   | L48_A56del, 54.9%; A751D, 45.7%; R689Q, 2.2% |
|             | MM relapse                 | L48_A56del, 61%; A751D, 42.3%                |
| MM-429      | MM onset                   | wild type                                    |
|             | MM relapse                 | wild type                                    |
| MM-295      | MM onset                   | wild type                                    |
|             | MM leukemic transformation | wild type                                    |
| MM-281      | MM onset                   | R780K, 36.8%                                 |
|             | MM leukemic transformation | R780K, 47.6%                                 |
| PCL-026     | pPCL onset                 | wild type                                    |
|             | pPCL relapse               | wild type                                    |

(Continued)

| <b>Sample name</b> | <b>Disease stage</b>       | <b><i>DIS3</i> status</b> |
|--------------------|----------------------------|---------------------------|
| <b>PCL-038</b>     | pPCL onset                 | wild type                 |
|                    | pPCL relapse               | wild type                 |
| <b>MM-442</b>      | MM leukemic transformation | wild type                 |
|                    | sPCL relapse               | wild type                 |

**Supplementary Table S4. Modulated genes between *DIS3*- wild type and mutated patients**

| Gene                 | SAM score |
|----------------------|-----------|
| <i>LOC100132356</i>  | -7.27998  |
| <i>DKFZP434I0714</i> | -7.24885  |
| <i>ILF3-AS1</i>      | -5.8891   |
| <i>FLJ30403</i>      | -5.73335  |
| <i>ARHGAP5-AS1</i>   | -5.63017  |
| <i>HEXA-AS1</i>      | -5.52727  |
| <i>C5orf54</i>       | -5.41888  |
| <i>C11orf71</i>      | -5.0731   |
| <i>ZNF594</i>        | -5.01186  |
| <i>FLJ38717</i>      | -4.90146  |
| <i>LOC100049716</i>  | -4.82276  |
| <i>CXorf21</i>       | -4.79455  |
| <i>LOC648987</i>     | -4.75759  |
| <i>TAPT1-AS1</i>     | -4.65361  |
| <i>C10orf111</i>     | -4.55991  |
| <i>APOBEC4</i>       | -4.54461  |
| <i>PRORS1P</i>       | -4.35225  |
| <i>LINC00167</i>     | -4.34833  |
| <i>DDX60</i>         | -4.29767  |
| <i>CATSPER2P1</i>    | -4.21904  |
| <i>SPRYD4</i>        | -4.19583  |
| <i>POPI</i>          | -4.13861  |
| <i>PFN4</i>          | -4.08844  |
| <i>LINC00173</i>     | -3.94784  |
| <i>LOC153684</i>     | -3.93605  |
| <i>APOLD1</i>        | -3.92105  |
| <i>LOC100128398</i>  | -3.87278  |
| <i>NUDT9P1</i>       | -3.83567  |
| <i>C1orf220</i>      | -3.6607   |
| <i>RNU12</i>         | -3.64519  |
| <i>HTATSF1P2</i>     | -3.62834  |
| <i>DHX58</i>         | -3.61677  |
| <i>RNU11</i>         | -3.61058  |
| <i>CENPM</i>         | -3.58134  |
| <i>STPG2</i>         | -3.54494  |
| <i>FAM218A</i>       | -3.50969  |

(Continued)

| Gene                | SAM score |
|---------------------|-----------|
| <i>FREM3</i>        | -3.49656  |
| <i>FIGN</i>         | -3.47013  |
| <i>IFIT3</i>        | -3.46587  |
| <i>ZNF268</i>       | -3.46146  |
| <i>NS3BP</i>        | -3.40966  |
| <i>ANXA2R</i>       | -3.36509  |
| <i>LDOC1L</i>       | -3.3559   |
| <i>C21orf119</i>    | -3.34986  |
| <i>C11orf65</i>     | -3.33332  |
| <i>FLJ37201</i>     | -3.32968  |
| <i>LOC148696</i>    | -3.32702  |
| <i>DPM3</i>         | -3.30907  |
| <i>SLC4A5</i>       | -3.2872   |
| <i>LOC100506571</i> | -3.28623  |
| <i>FLJ38576</i>     | -3.26721  |
| <i>PLA2G6</i>       | -3.24009  |
| <i>ZNRD1-AS1</i>    | -3.23349  |
| <i>PCDHGA1</i>      | -3.22484  |
| <i>PATL2</i>        | -3.21516  |
| <i>C9orf43</i>      | -3.21034  |
| <i>RNU5D-1</i>      | -3.20768  |
| <i>IL22RA1</i>      | -3.20672  |
| <i>C16orf54</i>     | -3.20079  |
| <i>SCIN</i>         | -3.1948   |
| <i>C5orf56</i>      | -3.18962  |
| <i>LINC00528</i>    | -3.17856  |
| <i>RBM45</i>        | -3.1685   |
| <i>GVINP1</i>       | -3.16364  |
| <i>KHDRBS2</i>      | -3.14396  |
| <i>MTG1</i>         | -3.1248   |
| <i>FAM154B</i>      | -3.12346  |
| <i>ST3GAL1</i>      | -3.12014  |
| <i>LOC100128288</i> | -3.10885  |
| <i>C7orf13</i>      | -3.10235  |
| <i>TTC30B</i>       | -3.10072  |
| <i>CXXC4</i>        | -3.09534  |

(Continued)

| Gene                | SAM score |
|---------------------|-----------|
| <i>IFIT1</i>        | -3.08992  |
| <i>MIR320A</i>      | -3.08972  |
| <i>RNU4ATAC</i>     | -3.08157  |
| <i>PAPSS2</i>       | -3.07687  |
| <i>HSD17B7</i>      | -3.07454  |
| <i>MATN1-AS1</i>    | -3.0743   |
| <i>LRRC23</i>       | -3.05173  |
| <i>ZNF141</i>       | -3.04218  |
| <i>MAP2</i>         | -3.02161  |
| <i>MED31</i>        | -3.01969  |
| <i>SFR1</i>         | -3.01663  |
| <i>APOBEC3F</i>     | -3.01397  |
| <i>GDF9</i>         | -3.01336  |
| <i>MPZ</i>          | -2.99457  |
| <i>LOC645212</i>    | -2.98619  |
| <i>CDNF</i>         | -2.98353  |
| <i>C1orf74</i>      | -2.97908  |
| <i>TP53TG1</i>      | -2.97753  |
| <i>RASL11B</i>      | -2.97566  |
| <i>LOC100129726</i> | -2.97513  |
| <i>GNRHR2</i>       | -2.97302  |
| <i>GPR135</i>       | -2.96435  |
| <i>OASL</i>         | -2.96341  |
| <i>CCDC87</i>       | -2.94704  |
| <i>HCG27</i>        | -2.93779  |
| <i>RNU5F-1</i>      | -2.92498  |
| <i>FAM227B</i>      | -2.91766  |
| <i>MIR23A</i>       | -2.91476  |
| <i>MIRLET7BHG</i>   | -2.91089  |
| <i>RIBC2</i>        | -2.8987   |
| <i>ZBTB26</i>       | -2.89665  |
| <i>PAN2</i>         | -2.89352  |
| <i>FZD7</i>         | -2.87535  |
| <i>CCDC85C</i>      | -2.87272  |
| <i>DLGAP1-AS1</i>   | -2.86802  |
| <i>HIST4H4</i>      | -2.85887  |

(Continued)



| <b>Gene</b>    | <b>SAM score</b> |
|----------------|------------------|
| <i>KANSL1L</i> | -2.85357         |
| <i>IFI6</i>    | -2.84554         |
| <i>EID2B</i>   | -2.83955         |
| <i>CCDC53</i>  | -2.83361         |
| <i>DDX60L</i>  | -2.82877         |
| <i>TTC23</i>   | -2.81725         |
| <i>ZNF70</i>   | -2.81337         |
| <i>COQ2</i>    | -2.81171         |
| <i>ODF3B</i>   | -2.80322         |
| <i>AGBL2</i>   | -2.79022         |
| <i>TMEM234</i> | -2.77988         |

**Supplementary Table S5. Clinical details of the 164 patients analyzed by NGS**

| Sample | Sex | Age | Disease | Stage <sup>d</sup> | Phase <sup>e</sup> | PP <sup>f</sup> | t(4;14) | t(11;14) | t(14;16) | t(14;20) | del(13)* | del(17p)* | 1q gain* | 1p loss* | HD <sup>o</sup> |
|--------|-----|-----|---------|--------------------|--------------------|-----------------|---------|----------|----------|----------|----------|-----------|----------|----------|-----------------|
| MM-004 | F   | 58  | MM      | IA                 | D                  | Gk              | -       | -        | +        | -        | -        | na        | na       | na       | na              |
| MM-015 | M   | 71  | MM      | IIA                | D                  | Gk              | -       | +        | -        | -        | -        | -         | -        | -        | -               |
| MM-016 | M   | 66  | MM      | IIIB               | D                  | Gk              | -       | -        | -        | -        | -        | -         | +        | -        | +               |
| MM-026 | F   | 72  | MM      | IIIB               | D                  | k               | -       | +        | -        | -        | -        | -         | -        | na       | na              |
| MM-027 | M   | 60  | MM      | IA                 | D                  | Gk              | -       | -        | -        | -        | +        | -         | na       | na       | na              |
| MM-030 | M   | 69  | MM      | IIIA               | D                  | Gλ              | -       | -        | -        | -        | -        | -         | -        | +        | +               |
| MM-031 | M   | 58  | MM      | IIIA               | D                  | Ak              | -       | +        | -        | -        | -        | -         | +        | +        | -               |
| MM-034 | M   | 71  | MM      | IA                 | D                  | Gk              | -       | -        | -        | -        | -        | -         | -        | -        | +               |
| MM-036 | M   | 65  | MM      | IIA                | D                  | Gk              | -       | -        | -        | -        | +        | -         | +        | na       | -               |
| MM-037 | F   | 50  | MM      | IIA                | D                  | Gk+Ak           | -       | +        | -        | -        | +        | -         | -        | -        | -               |
| MM-038 | F   | 67  | MM      | IIA                | D                  | k               | -       | -        | -        | -        | +        | -         | -        | -        | +               |
| MM-039 | M   | 50  | MM      | IIA                | D                  | Gλ              | -       | -        | -        | -        | -        | -         | -        | na       | +               |
| MM-042 | M   | 54  | MM      | IIIA               | D                  | Aλ              | +       | -        | -        | -        | +        | -         | +        | -        | +               |
| MM-043 | F   | 73  | MM      | IA                 | D                  | Gk+Gλ           | -       | -        | -        | -        | -        | -         | +        | -        | -               |
| MM-049 | M   | 62  | MM      | IIIB               | D                  | k               | -       | -        | -        | -        | -        | -         | -        | -        | +               |
| MM-055 | F   | 69  | MM      | IIIA               | D                  | Gk              | -       | +        | -        | -        | -        | -         | -        | na       | -               |
| MM-066 | F   | 77  | MM      | IIIA               | D                  | Ak              | +       | -        | -        | -        | -        | -         | -        | na       | -               |
| MM-069 | M   | 63  | MM      | IIA                | D                  | Gk              | -       | -        | -        | +        | +        | -         | +        | na       | -               |
| MM-078 | F   | 59  | MM      | IIIA               | D                  | k               | -       | -        | -        | -        | +        | -         | -        | na       | +               |
| MM-079 | F   | 74  | MM      | IIA                | D                  | Gk+Gλ           | -       | -        | -        | -        | -        | -         | -        | -        | +               |
| MM-087 | F   | 84  | MM      | IIIA               | D                  | Gλ              | +       | -        | -        | -        | +        | -         | +        | na       | -               |
| MM-115 | F   | 53  | MM      | IIIA               | D                  | Gλ              | -       | +        | -        | -        | +        | -         | na       | na       | -               |
| MM-123 | M   | 55  | MM      | IIIA               | D                  | Gk              | +       | -        | -        | -        | +        | -         | +        | -        | -               |
| MM-131 | M   | 73  | MM      | IA                 | D                  | Gk              | -       | -        | -        | -        | -        | -         | -        | -        | -               |
| MM-143 | M   | 61  | MM      | IIA                | D                  | Gk              | -       | -        | -        | -        | -        | -         | +        | -        | +               |
| MM-146 | M   | 68  | MM      | IIA                | D                  | Gλ              | -       | -        | -        | -        | -        | -         | +        | na       | +               |

(Continued)

| Sample | Sex | Age | Disease | Stage <sup>d</sup> | Phase <sup>e</sup> | PP <sup>f</sup> | t(4;14) | t(11;14) | t(14;16) | t(14;20) | del(13)* | del(17p)* | 1q gain* | 1p loss* | HD <sup>o</sup> |
|--------|-----|-----|---------|--------------------|--------------------|-----------------|---------|----------|----------|----------|----------|-----------|----------|----------|-----------------|
| MM-148 | F   | 55  | MM      | IA                 | D                  | Aκ              | -       | -        | -        | -        | -        | +         | +        | na       | +               |
| MM-149 | F   | 52  | MM      | IA                 | D                  | Gλ              | -       | -        | -        | -        | -        | -         | -        | -        | +               |
| MM-150 | F   | 68  | MM      | IIA                | D                  | Gλ              | -       | -        | -        | -        | -        | -         | +        | -        | +               |
| MM-151 | F   | 71  | MM      | IA                 | D                  | Gλ              | -       | -        | -        | -        | -        | -         | -        | -        | +               |
| MM-152 | M   | 66  | MM      | IA                 | D                  | Gκ              | -       | -        | -        | -        | -        | -         | -        | na       | +               |
| MM-154 | F   | 71  | MM      | IIA                | D                  | Gκ              | -       | -        | +        | -        | +        | -         | +        | -        | -               |
| MM-159 | M   | 56  | MM      | IIA                | D                  | κ               | -       | +        | -        | -        | +        | -         | -        | -        | -               |
| MM-174 | M   | 85  | MM      | IIA                | D                  | Aκ              | -       | -        | -        | -        | -        | -         | -        | -        | +               |
| MM-177 | M   | 73  | MM      | IIIA               | D                  | Gκ              | -       | -        | -        | -        | +        | -         | +        | -        | -               |
| MM-179 | M   | 50  | MM      | IIIA               | D                  | Gλ              | -       | +        | -        | -        | -        | +         | -        | -        | +               |
| MM-195 | M   | 62  | MM      | IIA                | D                  | Gκ              | +       | -        | -        | -        | +        | -         | -        | -        | -               |
| MM-200 | F   | 63  | MM      | IA                 | D                  | Aλ              | -       | -        | -        | -        | -        | -         | -        | -        | +               |
| MM-202 | M   | 64  | MM      | IIIA               | D                  | Gκ              | -       | -        | -        | -        | -        | -         | +        | na       | +               |
| MM-206 | F   | 73  | MM      | IIA                | D                  | Gκ              | +       | -        | -        | -        | +        | -         | -        | +        | -               |
| MM-207 | F   | 68  | MM      | IA                 | D                  | Aκ              | -       | -        | -        | -        | +        | -         | +        | -        | -               |
| MM-208 | M   | 74  | MM      | IIA                | D                  | Aλ              | +       | -        | -        | -        | -        | -         | -        | -        | -               |
| MM-209 | F   | 65  | MM      | IIA                | D                  | Gλ              | -       | -        | -        | -        | -        | -         | -        | -        | +               |
| MM-210 | M   | 65  | MM      | IIB                | D                  | Aλ              | -       | -        | -        | -        | -        | -         | -        | -        | -               |
| MM-212 | F   | 55  | MM      | IIIA               | D                  | Gκ              | -       | +        | -        | -        | -        | -         | -        | -        | -               |
| MM-213 | M   | 66  | MM      | IIIA               | D                  | λ               | -       | +        | -        | -        | +        | -         | -        | -        | -               |
| MM-219 | M   | 73  | MM      | IIIA               | D                  | Aλ              | -       | -        | -        | -        | +        | -         | -        | -        | +               |
| MM-224 | F   | 52  | MM      | IIIA               | D                  | Gκ              | -       | -        | +        | -        | -        | -         | +        | -        | -               |
| MM-229 | M   | 75  | MM      | IIA                | D                  | Gκ              | -       | -        | -        | -        | -        | -         | -        | -        | -               |
| MM-238 | M   | 58  | MM      | IIB                | D                  | Gκ              | -       | -        | -        | -        | +        | -         | +        | -        | -               |
| MM-239 | F   | 72  | MM      | IIA                | D                  | Aκ              | -       | -        | -        | -        | +        | -         | -        | -        | +               |

(Continued)

| Sample | Sex | Age | Disease | Stage <sup>d</sup> | Phase <sup>e</sup> | PP <sup>f</sup> | t(4;14) | t(11;14) | t(14;16) | t(14;20) | del(13)* | del(17p)* | Iq gain* | Iq loss* | HD <sup>o</sup> |
|--------|-----|-----|---------|--------------------|--------------------|-----------------|---------|----------|----------|----------|----------|-----------|----------|----------|-----------------|
| MM-240 | M   | 70  | MM      | IA                 | D                  | Gλ              | -       | -        | -        | -        | -        | -         | -        | -        | +               |
| MM-241 | M   | 54  | MM      | IIA                | D                  | Gκ              | -       | -        | -        | -        | -        | -         | -        | -        | +               |
| MM-242 | M   | 69  | MM      | IIIA               | D                  | Aκ              | -       | -        | -        | -        | +        | -         | -        | -        | +               |
| MM-243 | F   | 68  | MM      | IIA                | D                  | Gκ              | -       | -        | -        | -        | -        | -         | +        | -        | +               |
| MM-246 | M   | 71  | MM      | IIIA               | D                  | Aλ              | -       | +        | -        | -        | -        | -         | -        | -        | -               |
| MM-252 | F   | 77  | MM      | IIA                | D                  | Aλ              | -       | +        | -        | -        | -        | -         | +        | -        | -               |
| MM-256 | M   | 58  | MM      | IIIA               | D                  | Aκ              | -       | -        | +        | -        | +        | -         | -        | -        | -               |
| MM-261 | F   | 66  | MM      | IIB                | D                  | Gκ              | -       | -        | -        | -        | +        | -         | +        | -        | +               |
| MM-262 | M   | 74  | MM      | IA                 | D                  | λ               | -       | -        | -        | -        | -        | -         | +        | -        | -               |
| MM-263 | F   | 65  | MM      | IIB                | D                  | κ               | -       | -        | -        | -        | +        | -         | +        | -        | -               |
| MM-267 | M   | 74  | MM      | IIIA               | D                  | Gλ              | -       | -        | -        | -        | +        | -         | -        | -        | +               |
| MM-268 | M   | 77  | MM      | IIIB               | D                  | Gκ              | -       | -        | -        | -        | -        | -         | -        | -        | -               |
| MM-269 | F   | 67  | MM      | IIA                | D                  | Gκ              | -       | -        | -        | -        | +        | -         | -        | -        | +               |
| MM-271 | M   | 76  | MM      | IA                 | D                  | Gκ              | -       | -        | -        | -        | +        | -         | -        | -        | -               |
| MM-274 | M   | 59  | MM      | IIA                | D                  | Gκ              | +       | -        | -        | -        | -        | -         | -        | -        | -               |
| MM-276 | F   | 70  | MM      | IIB                | D                  | Gκ              | +       | -        | -        | -        | +        | -         | -        | -        | -               |
| MM-278 | M   | 73  | MM      | IIA                | D                  | Gλ              | -       | -        | -        | -        | -        | -         | -        | +        | +               |
| MM-279 | F   | 71  | MM      | IIIA               | D                  | Gλ              | -       | -        | -        | na       | +        | -         | +        | -        | na              |
| MM-280 | M   | 62  | MM      | IIIA               | D                  | Gλ              | -       | +        | -        | -        | -        | -         | -        | -        | -               |
| MM-281 | F   | 77  | MM      | IIA                | D                  | Gκ              | -       | -        | -        | -        | -        | -         | -        | -        | -               |
| MM-282 | M   | 66  | MM      | IIIA               | D                  | Gκ              | -       | -        | -        | -        | -        | -         | +        | -        | +               |
| MM-284 | M   | 49  | MM      | IIIA               | D                  | κ               | -       | +        | -        | -        | na       | -         | -        | -        | -               |
| MM-286 | F   | 71  | MM      | IIA                | D                  | Gκ              | -       | -        | -        | -        | +        | -         | -        | -        | -               |
| MM-295 | F   | 74  | MM      | IIIA               | D                  | λ               | -       | -        | -        | -        | +        | -         | na       | na       | na              |
| MM-300 | M   | 65  | MM      | IIB                | D                  | Gκ              | -       | -        | -        | -        | -        | -         | na       | na       | na              |
| MM-301 | F   | 72  | MM      | IIA                | D                  | Aλ              | -       | -        | -        | -        | -        | -         | +        | -        | +               |
| MM-302 | M   | 65  | MM      | IA                 | D                  | Aκ              | -       | -        | -        | -        | -        | -         | +        | -        | +               |

(Continued)

| Sample | Sex | Age | Disease | Stage <sup>d</sup> | Phase <sup>e</sup> | PP <sup>f</sup> | t(4;14) | t(11;14) | t(14;16) | t(14;20) | del(13)* | del(17p)* | 1q gain* | 1p loss* | HD <sup>o</sup> |
|--------|-----|-----|---------|--------------------|--------------------|-----------------|---------|----------|----------|----------|----------|-----------|----------|----------|-----------------|
| MM-308 | M   | 58  | MM      | IA                 | D                  | Aκ              | -       | -        | -        | -        | -        | -         | -        | -        | -               |
| MM-313 | M   | 66  | MM      | IIIA               | D                  | Gλ              | -       | +        | -        | -        | -        | -         | -        | -        | -               |
| MM-310 | M   | 67  | MM      | IIIA               | D                  | Gλ              | -       | +        | -        | -        | -        | -         | -        | -        | -               |
| MM-314 | F   | 70  | MM      | IIIA               | D                  | Aλ              | -       | +        | -        | -        | -        | -         | +        | -        | -               |
| MM-317 | M   | 56  | MM      | IIA                | D                  | Gλ              | -       | +        | -        | -        | -        | -         | +        | -        | -               |
| MM-321 | M   | 63  | MM      | IIIA               | D                  | Gκ              | -       | -        | -        | -        | +        | -         | -        | -        | +               |
| MM-327 | F   | 62  | MM      | IIA                | D                  | absent          | -       | -        | -        | -        | +        | -         | +        | -        | +               |
| MM-330 | F   | 61  | MM      | IIIA               | D                  | Aκ              | +       | -        | -        | -        | +        | -         | +        | -        | -               |
| MM-334 | F   | 45  | MM      | IA                 | D                  | Gλ              | -       | -        | -        | -        | +        | +         | +        | +        | +               |
| MM-335 | F   | 68  | MM      | IIA                | D                  | Aκ              | -       | -        | +        | -        | +        | -         | -        | -        | -               |
| MM-340 | M   | 46  | MM      | IIIA               | D                  | Gλ              | -       | +        | -        | -        | +        | -         | -        | -        | -               |
| MM-341 | M   | 65  | MM      | IIIA               | D                  | Gκ              | -       | -        | -        | -        | -        | -         | +        | -        | -               |
| MM-343 | M   | 74  | MM      | IIIA               | D                  | Aλ              | -       | +        | -        | -        | -        | -         | -        | -        | -               |
| MM-351 | M   | na  | MM      | IIA                | D                  | Aκ              | -       | -        | -        | -        | -        | -         | -        | -        | -               |
| MM-362 | F   | 80  | MM      | IIA                | D                  | Gλ              | -       | -        | -        | -        | +        | +         | +        | -        | -               |
| MM-372 | M   | 54  | MM      | IA                 | D                  | Gκ              | -       | +        | -        | -        | -        | -         | +        | -        | -               |
| MM-375 | F   | 78  | MM      | IA                 | D                  | Gκ              | +       | -        | -        | -        | -        | +         | -        | -        | -               |
| MM-381 | F   | 69  | MM      | IA                 | D                  | Gκ              | -       | -        | -        | na       | -        | -         | -        | -        | na              |
| MM-382 | M   | 85  | MM      | IIA                | D                  | Gκ              | -       | -        | -        | -        | +        | +         | na       | na       | na              |
| MM-385 | F   | 76  | MM      | IIIA               | D                  | Gλ              | -       | -        | -        | -        | -        | -         | -        | -        | +               |
| MM-386 | F   | 76  | MM      | IIA                | D                  | Aλ              | -       | na       | na       | na       | -        | -         | na       | na       | na              |
| MM-387 | F   | 44  | MM      | IIIA               | D                  | Gκ              | -       | -        | -        | -        | -        | -         | +        | -        | +               |
| MM-392 | F   | 53  | MM      | IA                 | D                  | Gλ              | -       | -        | -        | -        | +        | -         | +        | -        | +               |
| MM-398 | F   | 65  | MM      | IIA                | D                  | Gκ              | -       | +        | -        | -        | +        | -         | +        | -        | -               |
| MM-402 | M   | 67  | MM      | IIA                | D                  | Gκ              | -       | +        | -        | -        | +        | -         | -        | -        | -               |
| MM-405 | M   | 69  | MM      | IA                 | D                  | Gκ              | -       | +        | -        | -        | -        | -         | -        | -        | -               |
| MM-406 | M   | 62  | MM      | IIB                | D                  | Aκ              | -       | +        | -        | -        | -        | -         | +        | -        | na              |

(Continued)

| Sample  | Sex | Age | Disease | Stage <sup>d</sup> | Phase <sup>e</sup> | PP <sup>f</sup> | t(4;14) | t(11;14) | t(14;16) | t(14;20) | del(13)* | del(17p)* | 1q gain* | 1p loss* | HD <sup>o</sup> |
|---------|-----|-----|---------|--------------------|--------------------|-----------------|---------|----------|----------|----------|----------|-----------|----------|----------|-----------------|
| MM-407  | F   | 79  | MM      | IIIA               | D                  | λ               | -       | -        | -        | -        | +        | -         | -        | -        | -               |
| MM-410  | F   | 79  | MM      | IIIA               | D                  | λ               | -       | -        | -        | -        | -        | -         | +        | -        | -               |
| MM-411  | M   | 67  | MM      | IIIA               | D                  | Gλ              | -       | -        | -        | -        | -        | -         | -        | -        | +               |
| MM-413  | F   | 51  | MM      | IIA                | D                  | Gκ              | -       | -        | -        | -        | +        | -         | +        | -        | +               |
| MM-414  | F   | 67  | MM      | IIIA               | D                  | Gλ              | -       | +        | -        | -        | -        | -         | -        | -        | -               |
| MM-422  | F   | 74  | MM      | IIB                | D                  | κ               | -       | -        | -        | -        | +        | -         | -        | -        | -               |
| MM-423  | F   | 53  | MM      | IIA                | D                  | λ               | +       | -        | -        | -        | +        | -         | -        | -        | -               |
| MM-424  | F   | 84  | MM      | IA                 | D                  | Gκ              | -       | -        | -        | -        | +        | -         | -        | +        | +               |
| MM-425  | F   | 65  | MM      | IIA                | D                  | Aλ              | -       | -        | -        | -        | +        | -         | +        | -        | -               |
| MM-428  | F   | 65  | MM      | IIA                | D                  | Aλ              | -       | -        | -        | -        | -        | -         | +        | +        | -               |
| MM-429  | F   | 63  | MM      | IIIA               | D                  | Gκ              | -       | -        | -        | -        | -        | -         | +        | -        | +               |
| MM-430  | na  | 62  | MM      | IIIA               | D                  | Gλ              | -       | -        | -        | -        | -        | -         | -        | -        | -               |
| MM-431  | F   | 70  | MM      | IA                 | D                  | Gλ              | +       | -        | -        | -        | +        | -         | +        | -        | -               |
| MM-433  | M   | 72  | MM      | IIB                | D                  | κ               | -       | -        | -        | -        | -        | -         | -        | -        | -               |
| MM-434  | F   | 53  | MM      | IIA                | D                  | κ               | -       | -        | -        | -        | +        | -         | -        | +        | -               |
| MM-435  | na  | 42  | MM      | IIIA               | D                  | Gλ              | -       | -        | -        | -        | -        | -         | -        | -        | +               |
| MM-437  | F   | 72  | MM      | IIB                | D                  | λ               | -       | -        | -        | -        | +        | -         | +        | -        | -               |
| MM-440  | na  | 61  | MM      | IIA                | D                  | Aκ              | -       | -        | -        | -        | -        | -         | -        | +        | +               |
| MM-441  | na  | na  | MM      | IA                 | D                  | Gλ              | -       | -        | -        | -        | -        | -         | -        | -        | -               |
| MM-442  | F   | 65  | sPCL    | /                  | D                  | Gκ              | -       | -        | -        | -        | +        | -         | +        | +        | -               |
| MM-445  | na  | 65  | MM      | IIA                | D                  | κ               | -       | +        | -        | -        | +        | -         | +        | -        | -               |
| MM-446  | na  | 52  | MM      | IIIA               | D                  | Gλ              | -       | -        | -        | -        | -        | -         | +        | -        | +               |
| MM-447  | na  | 57  | MM      | IIA                | D                  | Gκ              | -       | +        | -        | -        | -        | -         | +        | -        | -               |
| MM-448  | na  | 59  | MM      | IIA                | D                  | Aκ              | -       | -        | -        | -        | +        | -         | +        | -        | -               |
| MM-449  | na  | 54  | MM      | IIA                | D                  | Gκ              | -       | -        | -        | -        | +        | -         | -        | +        | -               |
| MM-464  | M   | 75  | MM      | IIIA               | D                  | Gλ              | -       | -        | -        | -        | +        | -         | +        | -        | -               |
| PCL-001 | F   | 51  | pPCL    | /                  | D                  | κ               | -       | -        | -        | +        | +        | -         | na       | na       | na              |

(Continued)

| Sample  | Sex | Age | Disease Stage <sup>d</sup> | Phase <sup>e</sup> | PP <sup>f</sup> | t(4;14) | t(11;14) | t(14;16) | t(14;20) | del(13)* | del(17p)* | Iq gain* | Ip loss* | HD <sup>o</sup> |
|---------|-----|-----|----------------------------|--------------------|-----------------|---------|----------|----------|----------|----------|-----------|----------|----------|-----------------|
| PCL-002 | F   | 69  | sPCL                       | /                  | R               | λ       | +        | -        | -        | +        | na        | -        | na       | na              |
| PCL-004 | M   | 72  | pPCL                       | /                  | D               | Gκ      | -        | +        | -        | -        | -         | -        | -        | -               |
| PCL-005 | M   | 76  | sPCL                       | /                  | R               | AK      | +        | -        | -        | -        | -         | -        | -        | -               |
| PCL-008 | M   | 57  | pPCL                       | /                  | D               | Gλ      | -        | +        | -        | +        | -         | -        | na       | na              |
| PCL-009 | F   | 77  | sPCL                       | /                  | R               | Gκ      | +        | -        | -        | +        | -         | +        | -        | -               |
| PCL-011 | M   | 76  | sPCL                       | /                  | R               | Gκ      | -        | +        | -        | +        | +         | +        | -        | -               |
| PCL-012 | F   | 62  | sPCL                       | /                  | R               | AK      | -        | +        | -        | -        | +         | -        | -        | -               |
| PCL-014 | M   | 72  | pPCL                       | /                  | D               | λ       | +        | -        | -        | +        | +         | -        | +        | -               |
| PCL-015 | M   | 78  | pPCL                       | /                  | D               | κ       | -        | +        | -        | +        | -         | +        | -        | -               |
| PCL-016 | F   | 57  | pPCL                       | /                  | D               | Gκ      | -        | +        | -        | +        | -         | +        | +        | -               |
| PCL-017 | F   | 68  | pPCL                       | /                  | D               | Gκ      | -        | +        | -        | +        | +         | +        | +        | -               |
| PCL-018 | F   | 59  | pPCL                       | /                  | D               | κ       | -        | -        | -        | +        | +         | -        | -        | -               |
| PCL-019 | F   | 67  | pPCL                       | /                  | D               | Mκ      | -        | +        | -        | +        | +         | +        | +        | -               |
| PCL-020 | F   | 79  | pPCL                       | /                  | D               | Gλ      | -        | -        | -        | -        | -         | +        | -        | -               |
| PCL-021 | M   | 48  | pPCL                       | /                  | D               | Gλ      | +        | -        | -        | +        | -         | +        | -        | -               |
| PCL-023 | M   | 60  | pPCL                       | /                  | D               | Gκ      | -        | -        | -        | +        | +         | +        | +        | -               |
| PCL-026 | F   | 59  | pPCL                       | /                  | D               | Gκ      | -        | +        | -        | +        | -         | +        | -        | -               |
| PCL-027 | M   | 65  | pPCL                       | /                  | D               | λ       | -        | -        | -        | -        | +         | -        | -        | -               |
| PCL-028 | F   | 57  | pPCL                       | /                  | D               | κ       | -        | +        | -        | +        | -         | -        | -        | -               |
| PCL-029 | M   | 51  | pPCL                       | /                  | D               | Aλ      | -        | +        | -        | -        | -         | -        | -        | -               |
| PCL-030 | F   | 52  | pPCL                       | /                  | D               | κ       | -        | -        | +        | +        | +         | -        | -        | -               |
| PCL-031 | F   | 59  | sPCL                       | /                  | D               | Gλ      | -        | -        | -        | -        | +         | +        | -        | -               |
| PCL-032 | M   | 51  | pPCL                       | /                  | D               | Gκ      | +        | -        | -        | +        | -         | +        | -        | -               |
| PCL-035 | F   | 76  | pPCL                       | /                  | D               | κ       | -        | -        | -        | -        | -         | -        | -        | -               |
| PCL-036 | M   | 72  | pPCL                       | /                  | D               | Gκ      | -        | +        | -        | +        | -         | -        | -        | -               |
| PCL-037 | M   | 72  | pPCL                       | /                  | D               | Aλ      | -        | -        | -        | +        | -         | -        | -        | -               |
| PCL-038 | M   | 57  | pPCL                       | /                  | D               | Gκ      | -        | -        | -        | +        | -         | +        | +        | +               |

(Continued)



| Sample  | Sex | Age | Disease | Stage <sup>Δ</sup> | Phase <sup>‡</sup> | PP <sup>†</sup> | t(4;14) | t(11;14) | t(14;16) | t(14;20) | del(13)* | del(17p)* | 1q gain* | 1p loss* | HD <sup>°</sup> |
|---------|-----|-----|---------|--------------------|--------------------|-----------------|---------|----------|----------|----------|----------|-----------|----------|----------|-----------------|
| PCL-039 | M   | 54  | sPCL    | /                  | D                  | Aκ              | -       | -        | -        | -        | -        | +         | -        | +        | -               |
| PCL-041 | M   | na  | sPCL    | /                  | D                  | Gκ              | -       | na       | na       | na       | -        | -         | na       | na       | na              |
| PCL-042 | F   | 69  | sPCL    | /                  | D                  | Gλ              | -       | +        | -        | -        | -        | -         | -        | -        | -               |
| PCL-043 | F   | 68  | pPCL    | /                  | D                  | Gλ              | -       | +        | -        | -        | -        | -         | -        | -        | -               |
| PCL-046 | F   | 50  | pPCL    | /                  | D                  | κ               | -       | -        | -        | -        | +        | -         | +        | -        | +               |

<sup>Δ</sup>The Durie clinical staging system was adopted; <sup>‡</sup>D: Diagnosis; R: relapse;

<sup>†</sup> Paraprotein; \*del(13), del(17), 1p loss and 1q gain were determined by FISH.

<sup>°</sup> HD: presence of the hyperdiploid status on the basis of FISH evaluation criteria. *na*: not available.

**Supplementary Table S6. Genome-specific primers for amplicon library preparation**

| Exon  | Amplicon localization<br>(hg19, chromosome 13) | Primer FWD                        | Primer REV                        |
|-------|------------------------------------------------|-----------------------------------|-----------------------------------|
| 1     | 73355681–73356065                              | 5'- GAAAGGGAAGAACCTCCGGG-3'       | 5'- TCCCTGTCATACCCCCTTGT-3'       |
| 2     | 73354916–73355271                              | 5'- GCTTCTTGGCTTAACTTATTCAGTG-3'  | 5'- ACAGGAACCTCTCCCGAA-3'         |
| 3     | 73352200–73352586                              | 5'- TGCTAAGAGTTTTACATATCCTTG-3'   | 5'- TCACATGAAGTTATATAGGACTACGA-3' |
| 4     | 73351452–73351809                              | 5'- AGGCTGTAGTGATGTGTAATTGC-3'    | 5'- GCTTACCCACCGACATTCC-3'        |
| 10    | 73346062–73346470                              | 5'- TATGTTGTAGTTGTGCTTTGGAAAT-3'  | 5'- CAATATGCTTGACTGGGTAAATGTA-3'  |
| 11    | 73345868–73346221                              | 5'- TTTGCTTGTTAATTACTCTTGTGAAG-3' | 5'- TTCATGGCCGTTTAAGAATC-3'       |
| 12–13 | 73345012–73345325                              | 5'- TTATGGCTAAGTAATCTGTGGTTCTA-3' | 5'-AAATTAGAGATTAATAGCCATGAAACG-3' |
| 14    | 73342807–73343130                              | 5'- GTAGTGAAAGTAGGAGGACATATTG-3'  | 5'- GAAGCTAGAAGAAACAGGAGTCT-3'    |
| 15    | 73339975–73340297                              | 5'- ACACTTGCTGTAGTCATTGTCTT-3'    | 5'- GCAAGCCAAATAAAGTAGAAATCAT-3'  |
| 16    | 73337539–73337917                              | 5'- GCGGAGTAACTGAGAGATGAAAG-3'    | 5'- CAGGTAGATCAAAACACAAATAGATG-3' |
| 17    | 73335921–73336221                              | 5'- GCCGAATCTCCTACTTTTCCA-3'      | 5'- CCAAAGCCGATGAACAATGA-3'       |
| 18    | 73335757–73336105                              | 5'- CTAGCGTCTCCAATATACACACA-3'    | 5'- CTAGCAGTATCGACAAAAGGCA-3'     |

**Supplementary Table S7. Sequence-specific exonic PCR primers**

| Primer FWD                     | Primer REV                      |
|--------------------------------|---------------------------------|
| 5'- CCGGGGTTAGGCGTATTCTA -3'   | 5'- AAGTGAGAAATCGCAGTGCC -3'    |
| 5'- TACTTGCTGCCCGACACTAA -3'   | 5'- GGAATACCAGCTTTCACCTTGTG -3' |
| 5'- ATGTTCCCATCAGCCTTTT -3'    | 5'- AAAATGTGACGTGGACAGGC -3'    |
| 5'- GGGAAATGAATCACAATGCTGA -3' | 5'- TCTGAACATGCTCTGCTTCG -3'    |
| 5'- AGTCTTTGGATCAGGCCGAA -3'   | 5'- GGCTATTGGGGCTGACTGTA -3'    |
| 5'- ACTATGGCTTAGCGTCTCCA -3'   | 5'- AACGTGCATCAGTGGCTTTT-3'     |
